# Supplementary material for: Constructing a square-like copper cluster to boost C–C coupling for CO2 electroreduction to ethylene
Source: Royal Society of Chemistry journal article supplement (doi:10.1039/d3ta03630h), 2023-01-01
Supplement: d3ta03630h1.pdf [file d3ta03630h1.pdf]

## Electronic Supporting Information

### **Constructing the Square-Like Copper Cluster to Boost C-C Coupling for CO<sub>2</sub> Electroreduction to Ethylene**

Tiantian Zhao,<sup>1</sup> Tingyu Yan,<sup>1</sup> Yuting Sun,<sup>1</sup> Zhongxu Wang,<sup>1</sup> Qinghai Cai,<sup>1</sup> Jingxiang  
Zhao<sup>1,\*</sup> Zhongfang Chen<sup>2,\*</sup>

<sup>1</sup> *College of Chemistry and Chemical Engineering, and Key Laboratory of Photonic  
and Electronic Bandgap Materials, Ministry of Education, Harbin Normal University,  
Harbin 150025, China*

<sup>2</sup> *Department of Chemistry, University of Puerto Rico, Rio Piedras Campus, San Juan,  
Puerto Rico 00931, USA*

\* To whom correspondence should be addressed. Email: [zhaojingxiang@hrbnu.edu.cn](mailto:zhaojingxiang@hrbnu.edu.cn)

(J. Z.); [zhongfang.chen1@upr.edu](mailto:zhongfang.chen1@upr.edu) (Z.C.)

## COMPUTATIONAL DETAILS

The overpotential ( $\eta$ ) for CO<sub>2</sub>RR to C<sub>2</sub>H<sub>4</sub> product can be obtained by the formula:  $\eta = U_E - U_L$ , where  $U_E$  is the equilibrium potential for C<sub>2</sub>H<sub>4</sub> generation (0.06 V);  $U_L$  is the limiting potential (-0.32 V). Thus,  $\eta$  is 0.38 V.

The dissolution potential ( $U_{\text{diss}} = U^\circ_{\text{diss}}(\text{bulk}) - E_f/ne$ ) is a good parameter to evaluate the electrochemical stability of metal doping, where  $U^\circ_{\text{diss}}(\text{bulk})$ ,  $E_f$ , and  $n$  are the standard dissolution potential of bulk metal (0.34 V), the formation energy of the catalyst (0.76 V), and the number of electrons involved in the dissolution, respectively. In details,  $U_{\text{diss}} = (0.34 \text{ V} - 0.76 \text{ eV}/2e) = -0.04 \text{ V}$ .

**Table S1.** The computed limiting potential ( $U_L$ , V) for the CO<sub>2</sub>-to-C<sub>2</sub>H<sub>4</sub> conversion in different solvation states.

| <b>Solvation</b>                        | <b><math>U_L</math></b> |
|-----------------------------------------|-------------------------|
| Without solvation                       | -0.32                   |
| Implicit Solvation                      | -0.30                   |
| Explicit Solvation                      | -0.35                   |
| Implicit Solvation + Explicit Solvation | -0.35                   |

**Table S2.** Computed free energy changes ( $\Delta G$ , in eV) for all potential elementary steps involved in the  $\text{CO}_2$  electroreduction ( $\text{CO}_2\text{ER}$ ) on the  $\text{Cu}_5\text{@MoS}_2$  catalyst.

Favorable steps are highlighted in red.

| Elementary step on $\text{Cu}_5\text{@MoS}_2$                                                                  | $\Delta G$ |
|----------------------------------------------------------------------------------------------------------------|------------|
| $* + \text{CO}_2 + \text{H}^+ \rightarrow *\text{COOH}$                                                        | 0.22       |
| $*\text{COOH} + \text{H}^+ + \text{e}^- \rightarrow *\text{CO} + \text{H}_2\text{O}$                           | 0.19       |
| $*\text{CO} + \text{CO} \rightarrow *\text{C}_2\text{O}_2$                                                     | -0.93      |
| $*\text{C}_2\text{O}_2 + \text{H}^+ + \text{e}^- \rightarrow *\text{C}_2\text{O}_2\text{H}$                    | 0.32       |
| $*\text{C}_2\text{O}_2 + \text{H}^+ + \text{e}^- \rightarrow *\text{COCHO}$                                    | 0.48       |
| $*\text{C}_2\text{O}_2\text{H} + \text{H}^+ + \text{e}^- \rightarrow *\text{C}_2\text{O} + \text{H}_2\text{O}$ | -0.73      |
| $*\text{C}_2\text{O}_2\text{H} + \text{H}^+ + \text{e}^- \rightarrow *\text{COCHOH}$                           | 0.73       |
| $*\text{C}_2\text{O}_2\text{H} + \text{H}^+ + \text{e}^- \rightarrow *\text{COHCOH}$                           | 0.39       |
| $*\text{C}_2\text{O}_2\text{H} + \text{H}^+ + \text{e}^- \rightarrow *\text{CHOCOHO}$                          | 0.67       |
| $*\text{C}_2\text{O} + \text{H}^+ + \text{e}^- \rightarrow *\text{CHCO}$                                       | 0.10       |
| $*\text{C}_2\text{O} + \text{H}^+ + \text{e}^- \rightarrow *\text{C-COH}$                                      | 1.23       |
| $*\text{C}_2\text{O} + \text{H}^+ + \text{e}^- \rightarrow *\text{C-CHO}$                                      | 0.15       |
| $*\text{CHCO} + \text{H}^+ + \text{e}^- \rightarrow *\text{CHCHO}$                                             | -0.36      |
| $*\text{CHCO} + \text{H}^+ + \text{e}^- \rightarrow *\text{CHCOH}$                                             | 0.14       |
| $*\text{CHCO} + \text{H}^+ + \text{e}^- \rightarrow *\text{CH}_2\text{CO}$                                     | 0.05       |
| $*\text{CHCHO} + \text{H}^+ + \text{e}^- \rightarrow *\text{CHCHOH}$                                           | 0.22       |
| $*\text{CHCHO} + \text{H}^+ + \text{e}^- \rightarrow *\text{CHCH}_2\text{O}$                                   | 0.36       |
| $*\text{CHCHO} + \text{H}^+ + \text{e}^- \rightarrow *\text{CH}_2\text{CHO}$                                   | 0.70       |
| $*\text{CHCHOH} + \text{H}^+ + \text{e}^- \rightarrow *\text{CHCH} + \text{H}_2\text{O}$                       | -0.12      |
| $*\text{CHCHOH} + \text{H}^+ + \text{e}^- \rightarrow *\text{CHCH}_2\text{OH}$                                 | 0.37       |
| $*\text{CHCHOH} + \text{H}^+ + \text{e}^- \rightarrow *\text{CH}_2\text{CHOH}$                                 | 0.13       |
| $*\text{CHCH} + \text{H}^+ + \text{e}^- \rightarrow *\text{CH}_2\text{CH}$                                     | 0.13       |
| $*\text{CH}_2\text{CH} + \text{H}^+ + \text{e}^- \rightarrow *\text{CH}_2\text{CH}_2$                          | -0.25      |
| $*\text{CH}_2\text{CH}_2 \rightarrow \text{CH}_2\text{CH}_2 + *$                                               | 0.22       |

**Table S3.** The quadratic relation between the energy (E) of the reaction intermediates and their dependence on the applied electrochemical potential (U).

| <b>Reaction intermediates</b>    | <b>Energy (E)</b>               | <b>R<sup>2</sup></b> |
|----------------------------------|---------------------------------|----------------------|
| *                                | $E = -0.96U^2 - 1.03U - 364.96$ | 0.99                 |
| *CO                              | $E = -1.35U^2 - 1.11U - 380.62$ | 0.99                 |
| *C <sub>2</sub> O <sub>2</sub>   | $E = -1.08U^2 + 0.01U - 396.25$ | 0.99                 |
| *C <sub>2</sub> O <sub>2</sub> H | $E = -0.91U^2 - 0.49U - 400.41$ | 0.99                 |
| *C <sub>2</sub> O                | $E = -1.04U^2 - 0.88U - 390.14$ | 0.99                 |
| *CHCO                            | $E = -0.94U^2 - 0.50U - 393.55$ | 0.99                 |
| *CHCHO                           | $E = -1.00U^2 - 0.67U - 397.83$ | 0.99                 |
| *CHCHOH                          | $E = -0.92U^2 - 0.74U - 401.44$ | 0.99                 |
| *CHCH                            | $E = -0.97U^2 - 1.04U - 390.23$ | 0.99                 |
| *CH <sub>2</sub> CH              | $E = -1.20U^2 - 0.82U - 393.40$ | 0.99                 |
| *CH <sub>2</sub> CH <sub>2</sub> | $E = -1.00U^2 - 1.14U - 397.88$ | 0.99                 |

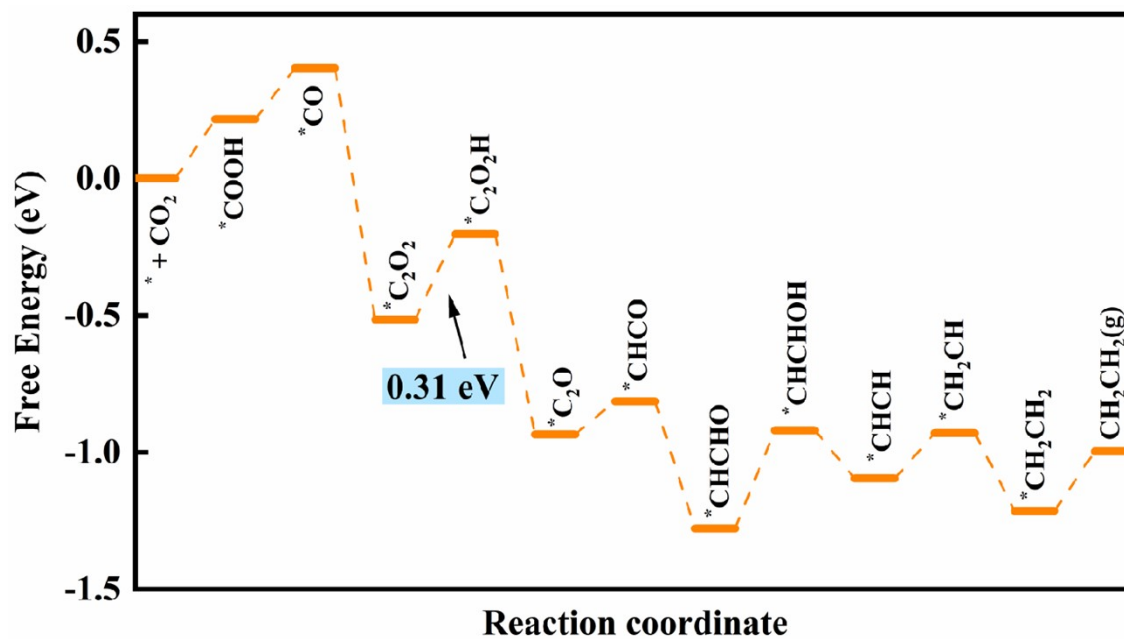

**Fig. S1.** The computed free energy profile for the CO<sub>2</sub>ER to C<sub>2</sub>H<sub>4</sub> production on Cu<sub>5</sub>/MoS<sub>2</sub> catalyst by using the revised Perdew-Burke-Ernzerhof (rPBE) functional.

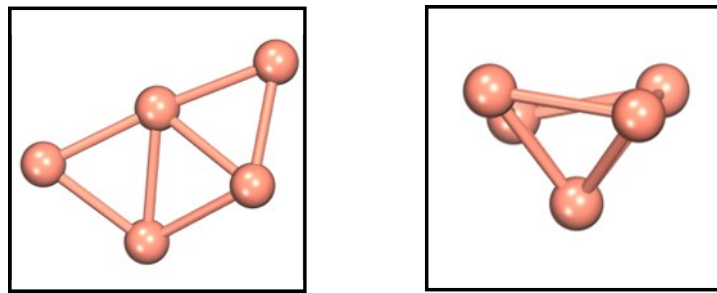

(a)

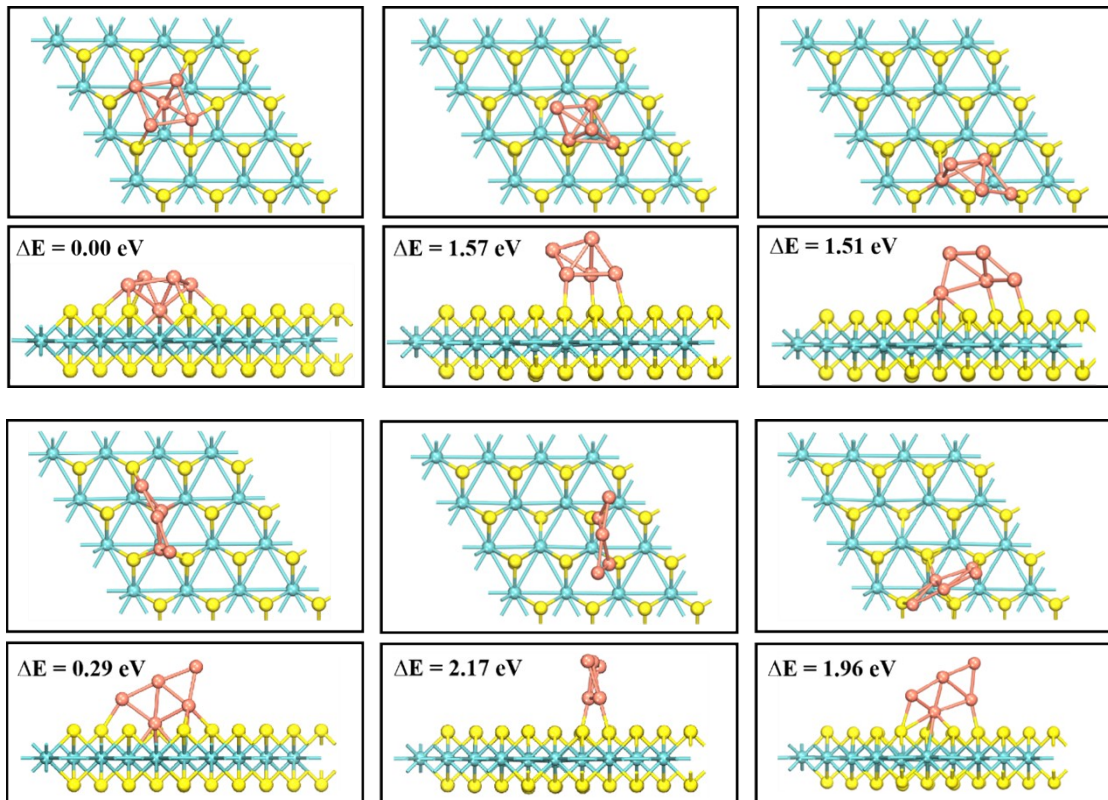

(b)

**Fig. S2.** (a) Optimized configurations of the planar and three-dimensional (3D)  $\text{Cu}_5$  clusters. (b) Optimized configurations of the two  $\text{Cu}_5$  clusters on different initial sites, along with their relative energies difference ( $\Delta E$ ).

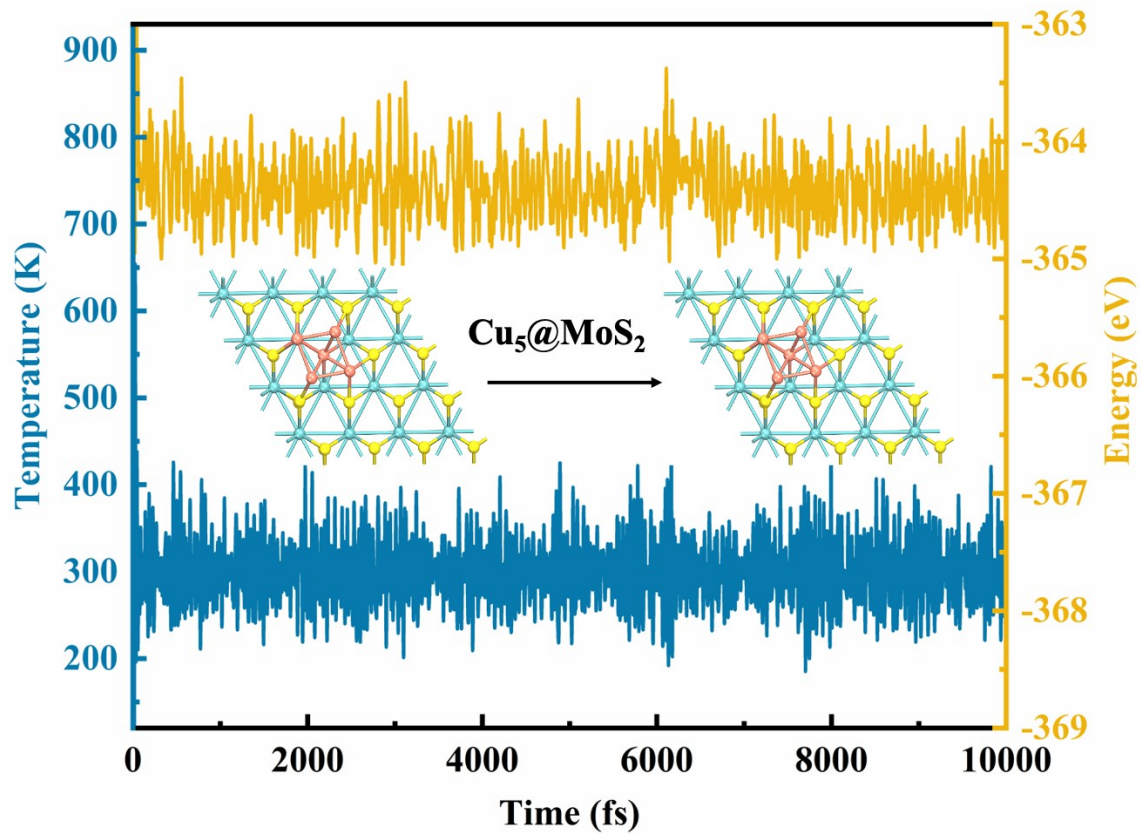

**Fig. S3.** Variations of temperature and energy as a function of the time for AIMD simulations of a  $4 \times 4$  supercell  $\text{Cu}_5@ \text{MoS}_2$  for 20 ps with a time step of 2 fs.



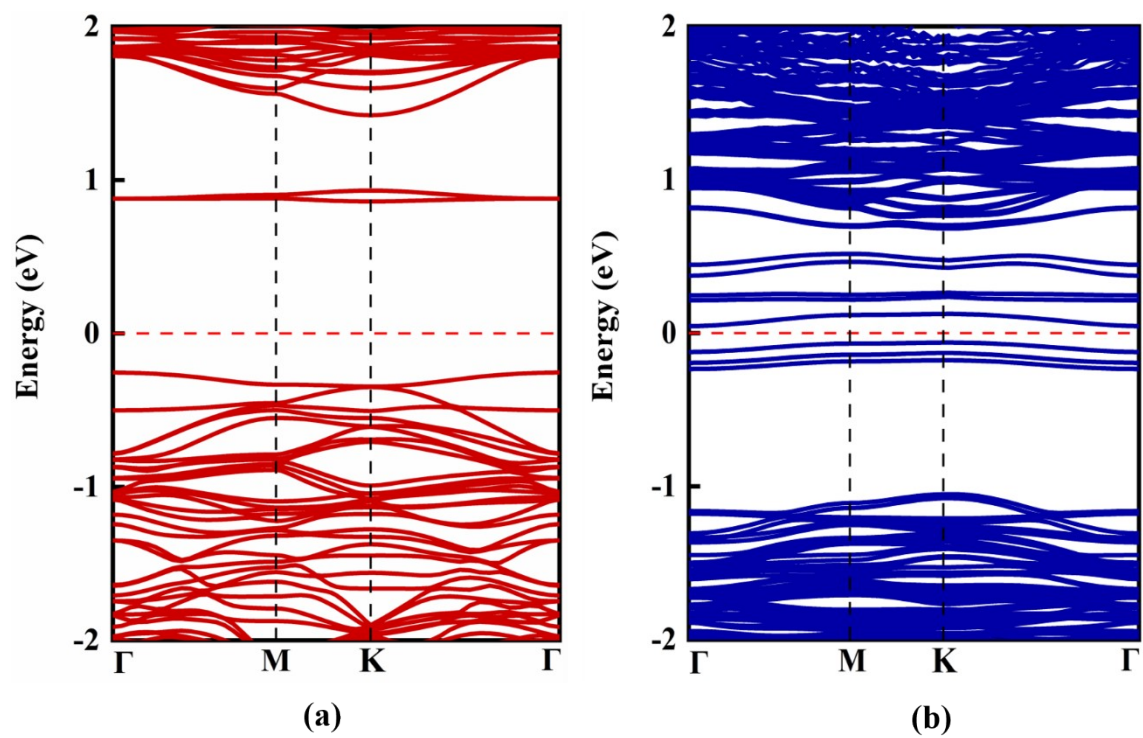

**Fig. S4.** Computed band structures of (a) the defective  $\text{MoS}_2$  monolayer and (b) the  $\text{Cu}_5@\text{MoS}_2$  catalyst. The Fermi level was set to zero in a dotted red line.

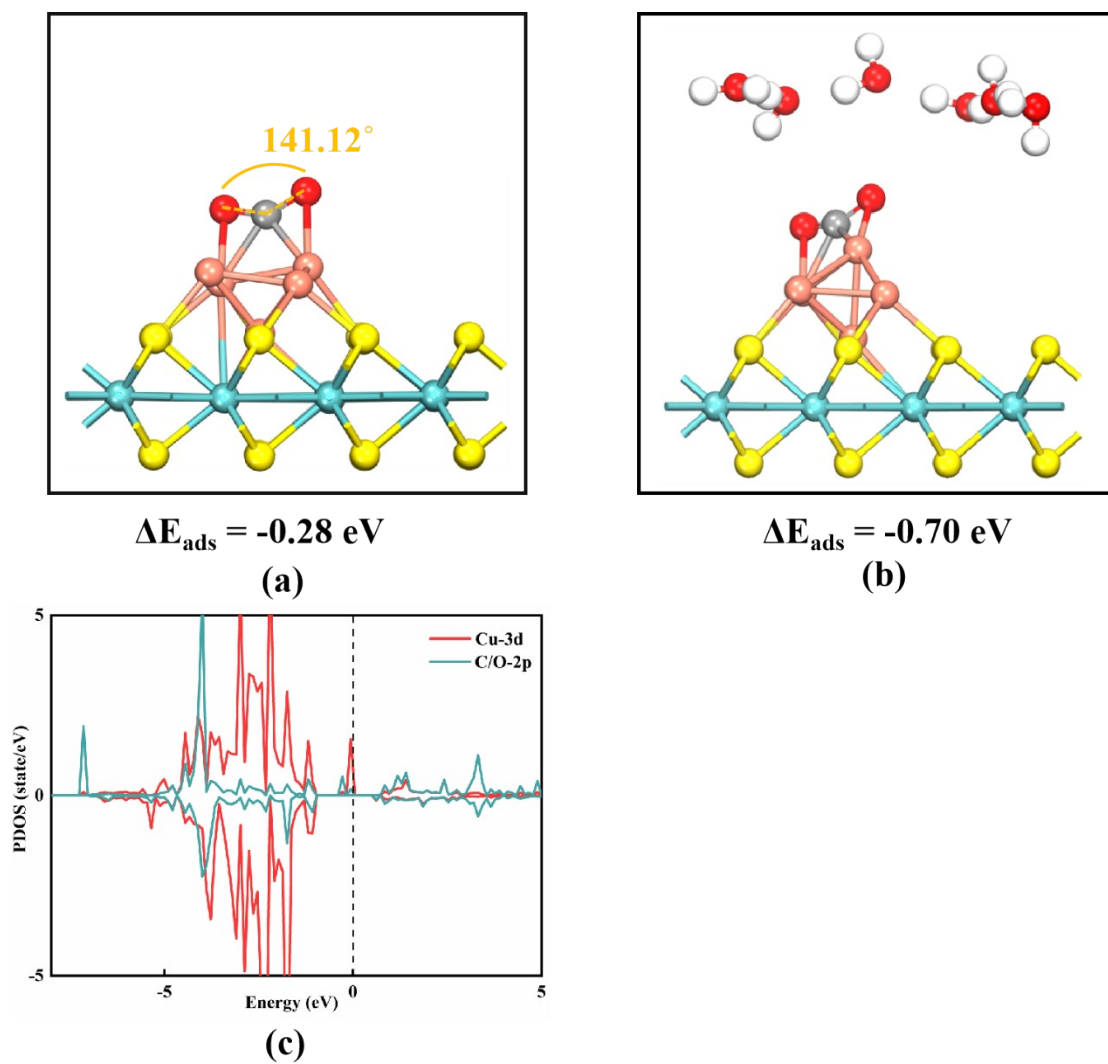

**Fig. S5.** Optimized  $^*\text{CO}_2$  adsorption structures on the  $\text{Cu}_5@\text{MoS}_2$  catalyst (a) without (b) with explicit solvent, (c) hybridization between C-2p/O-2p orbitals and Cu-3d orbitals.

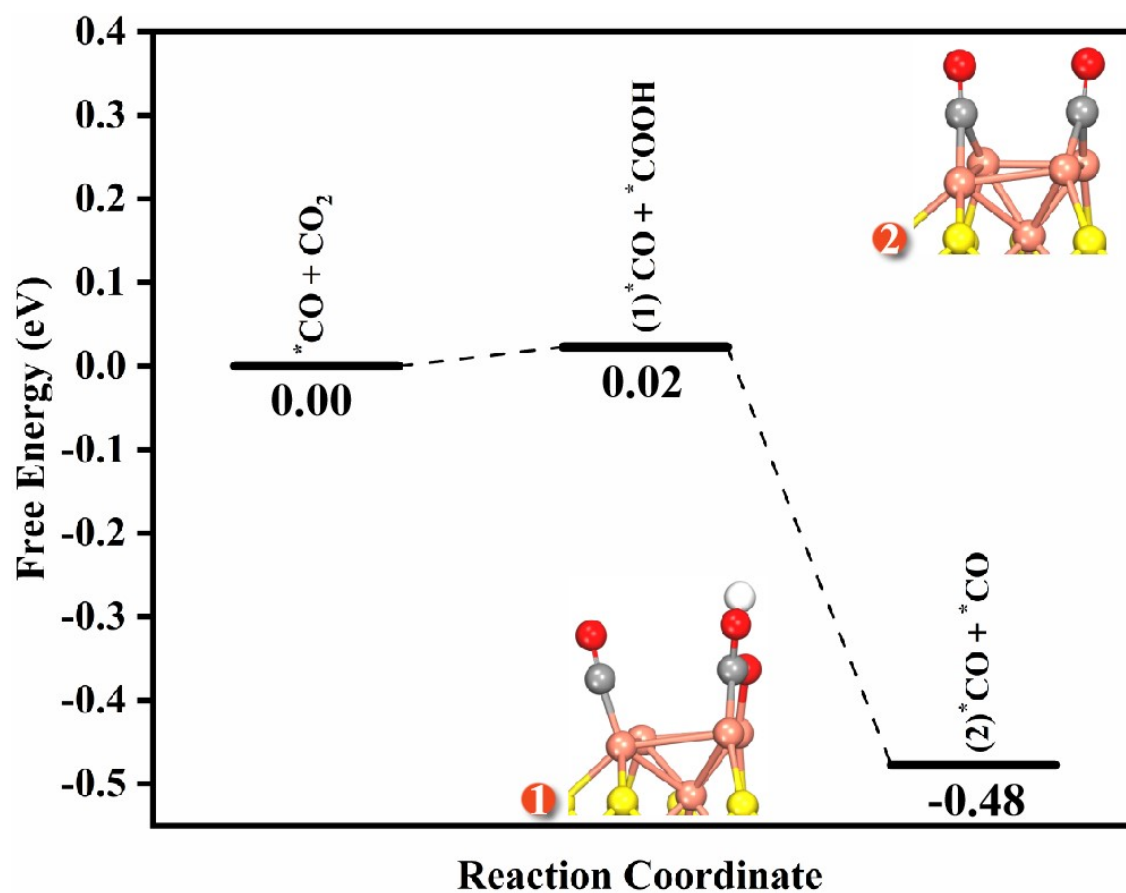

**Fig S6.** The computed free energy diagram illustrating the reaction pathway from  $*CO + CO_2$  to  $*CO + *CO$  on the Cu<sub>5</sub>@MoS<sub>2</sub> surface, including the relevant reaction intermediates.

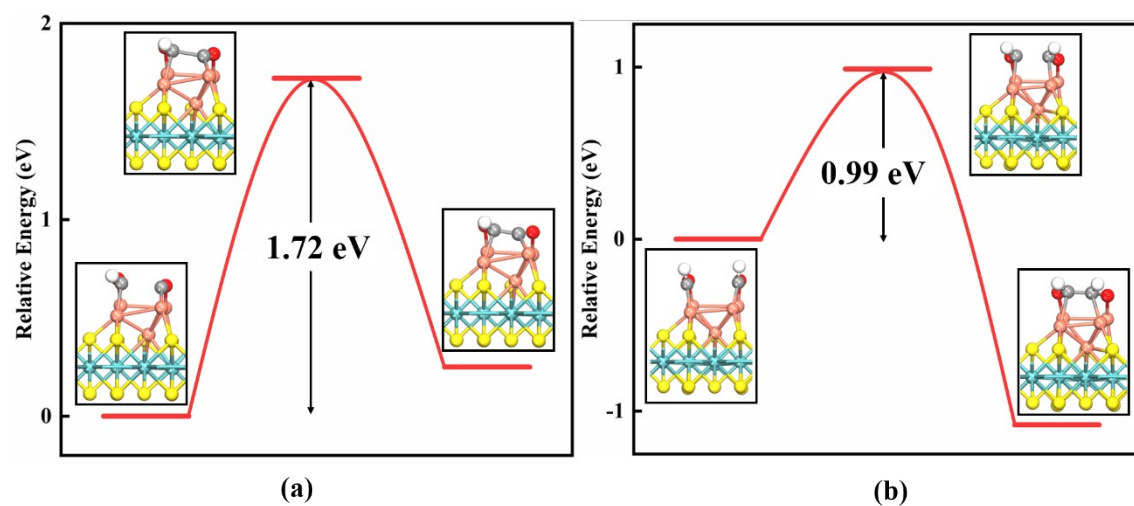

**Fig. S7.** The minimum-energy reaction paths for (a)  $^*CHO + ^*CO$ , and (b)  $^*CHO + ^*CHO$  on the  $Cu_5@MoS_2$  catalyst.

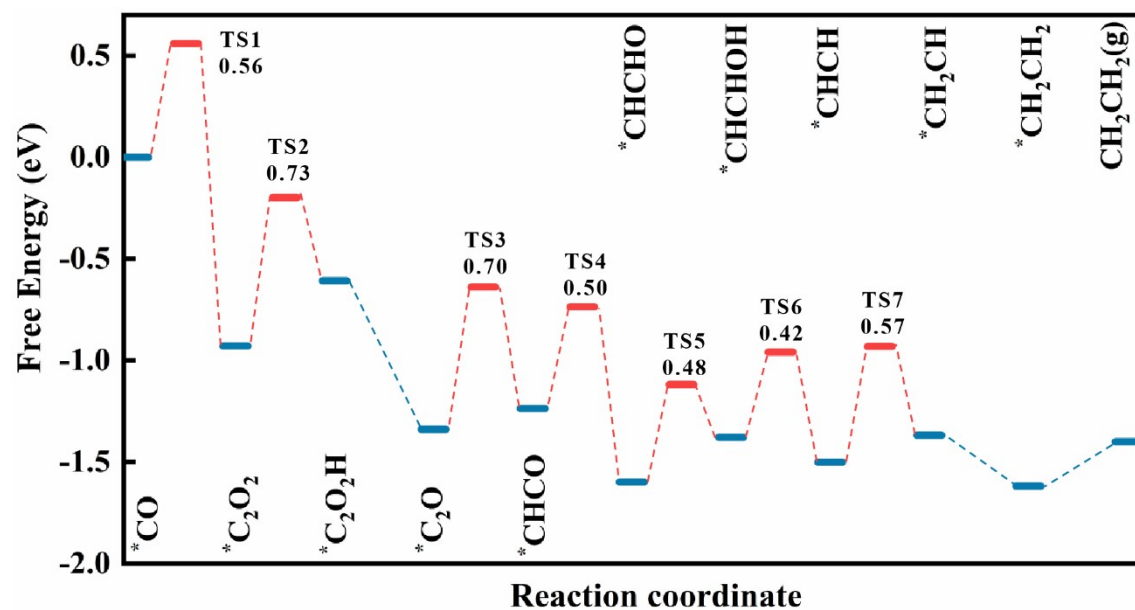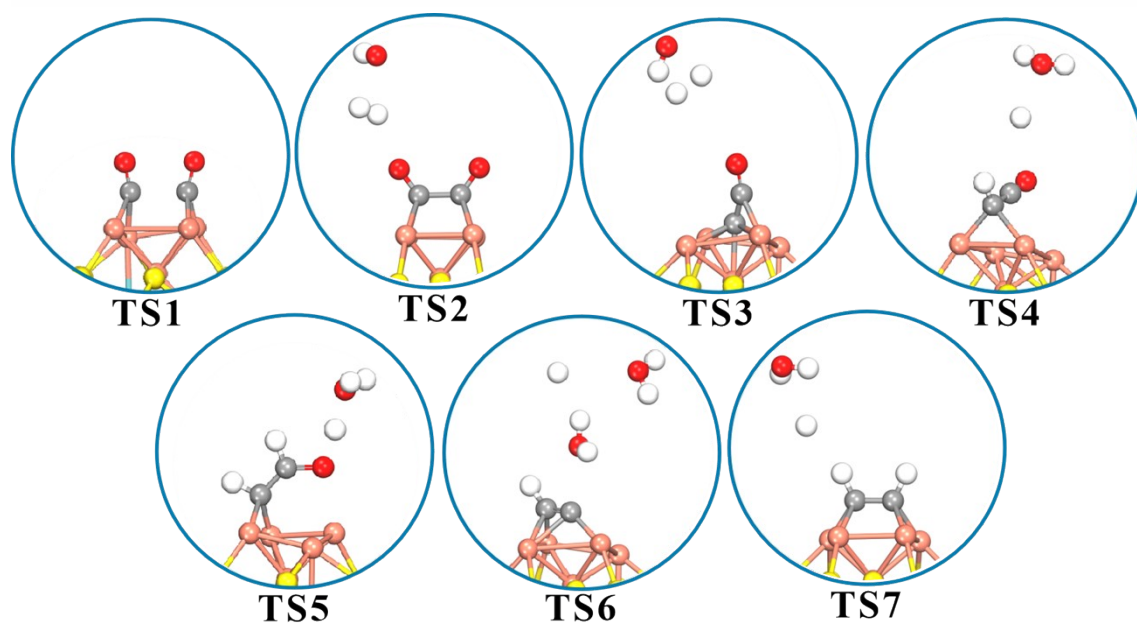

**Fig. S8.** The computed minimum energy path for CO<sub>2</sub>RR to C<sub>2</sub>H<sub>4</sub>, and the corresponding structures of various transition states (TSs).

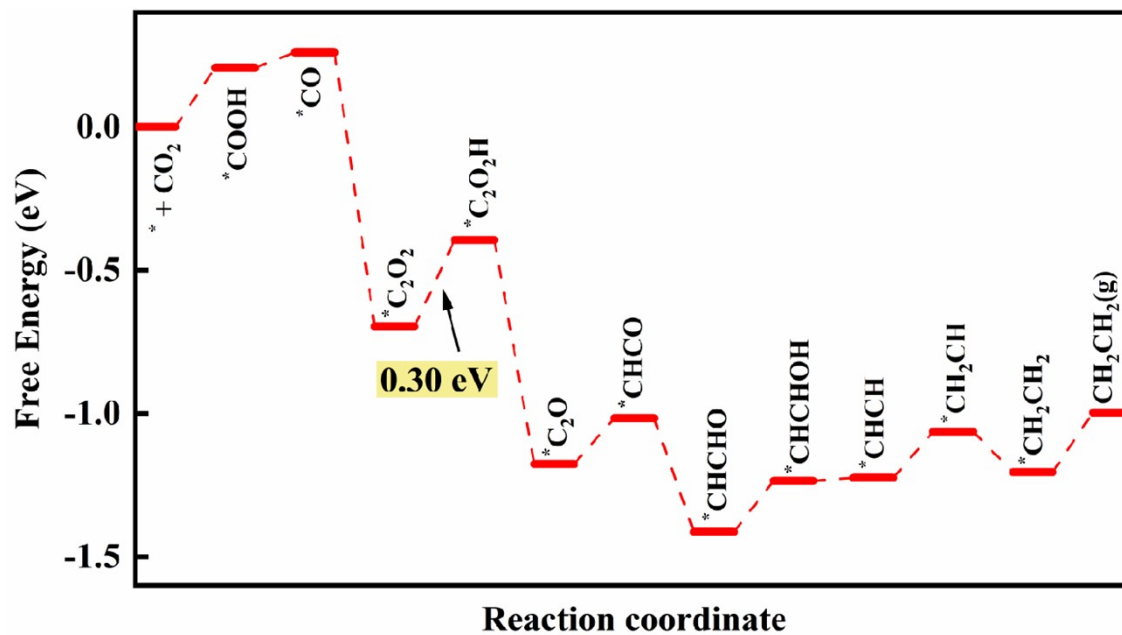

**Fig. S9.** The solvent effect on the catalytic activity of the design Cu<sub>5</sub>/MoS<sub>2</sub> catalyst.

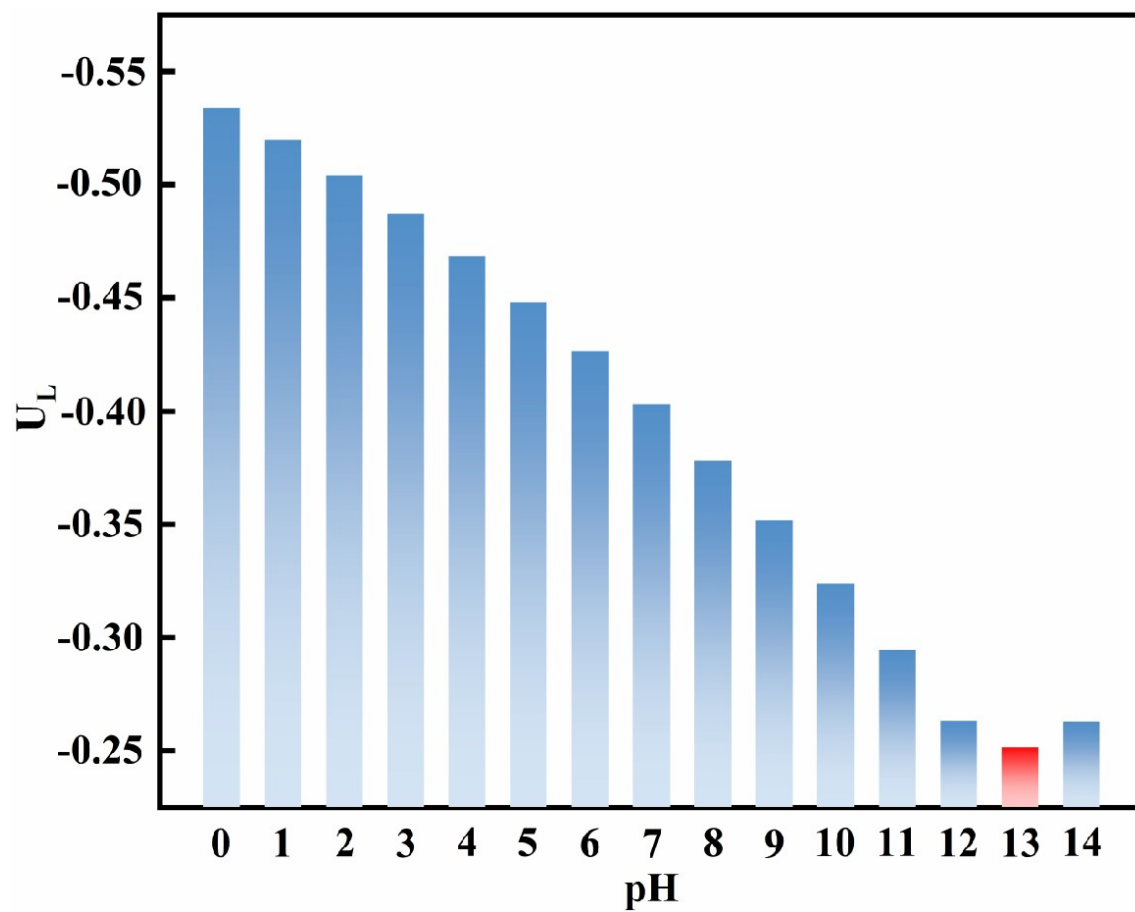

**Fig. S10.** Computed limiting potentials ( $U_L$ ) for  $\text{CO}_2\text{ER}$  to  $\text{C}_2\text{H}_4$  on the  $\text{Cu}_5@\text{MoS}_2$  surface at different pH values.

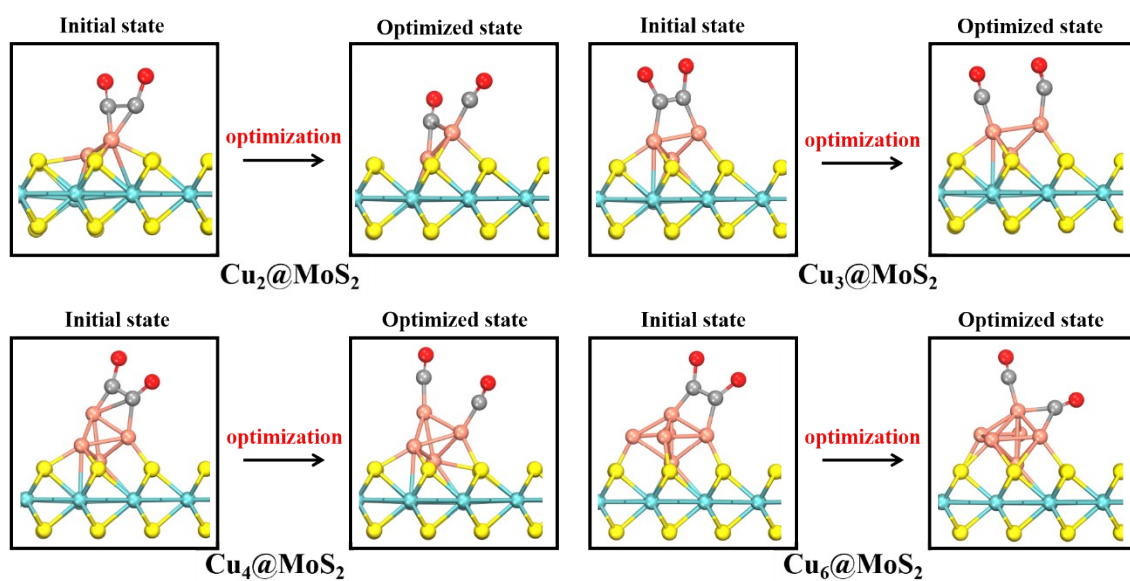

(a)

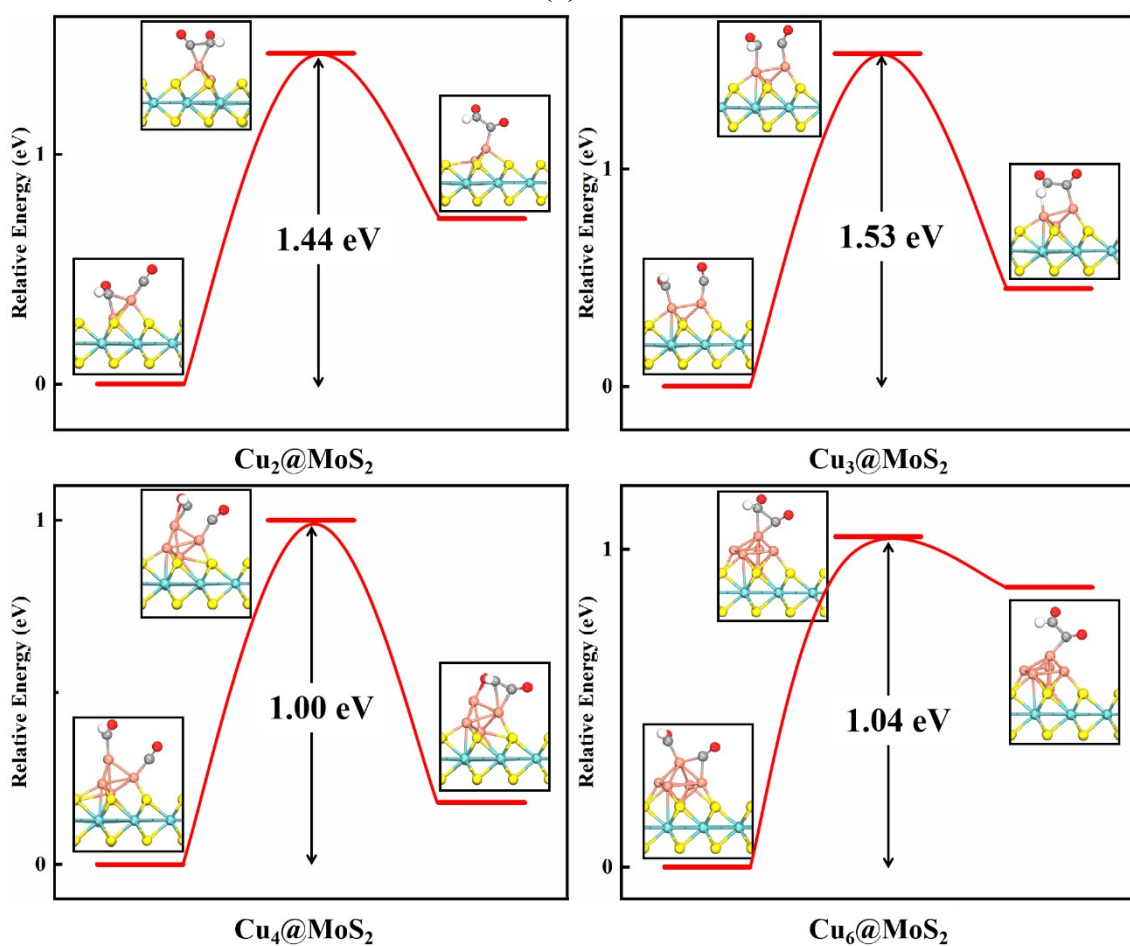

(b)

**Fig. S11.** (a) Two isolated CO species after full structural relaxation and (b) minimum-energy reaction paths for  $^*CHO + ^*CO$  on  $\text{Cu}_2@MoS_2$ ,  $\text{Cu}_3@MoS_2$ ,  $\text{Cu}_4@MoS_2$ , and  $\text{Cu}_6@MoS_2$  catalysts.
